# Supplementary material for: Unexpected phosphorus doping routine of planar silicon nanowires for integrating CMOS logics
Source: Royal Society of Chemistry journal article supplement (doi:10.1039/d1nr03014k), 2021-01-01
Supplement: d1nr03014k1.pdf [file d1nr03014k1.pdf]

*Supplementary Information to*

## Unexpected phosphorus doping routine of planar silicon nanowires for integrating CMOS logics

Ying Sun, Wentao Qian, Shuaishuai Liu, Taige Dong, Junzhan Wang, Jun Xu\*, Kunji Chen  
and Linwei Yu\*

National Laboratory of Solid State Microstructures/School of Electronics Science and  
Engineering, Nanjing University, Nanjing, 210093 Nanjing, P. R. China,

\*Emails: [yulinwei@nju.edu.cn](mailto:yulinwei@nju.edu.cn), [junxu@nju.edu.cn](mailto:junxu@nju.edu.cn)

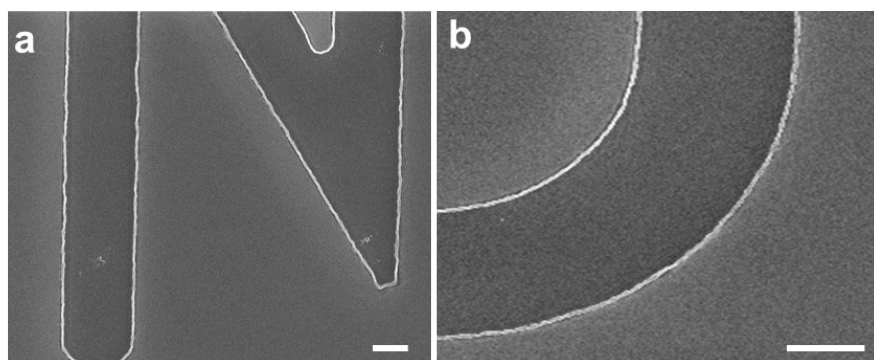

**Fig. S1.** Close SEM images of the ultralong n-type SiNWs grown along the curved or straight guiding edge lines. Scale bars are both for 2  $\mu\text{m}$ .

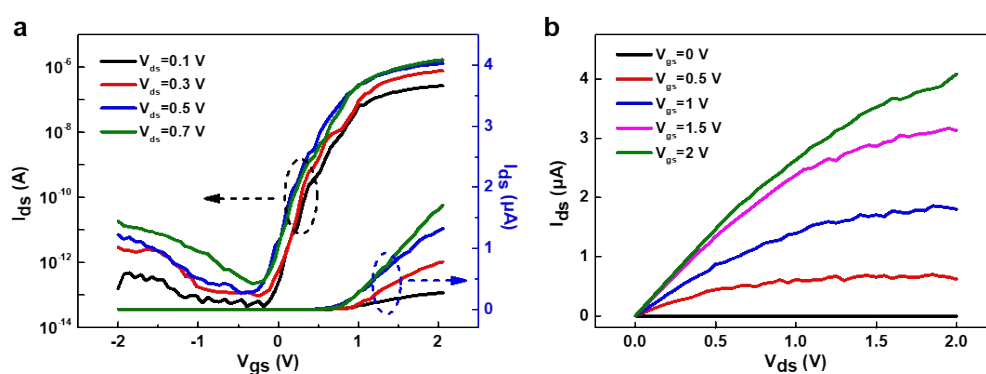

**Fig. S2.** Electrical properties of the n-type SiNW FETs. (a) presents the transfer curves under different  $V_{ds}$  biases, while the different output curves are shown in (b).
